# Supplementary material
Source: Springer Nature journal article supplement (https://www.springermedizin.de/resource/supplementary/12943_2013_1304_MOESM8_ESM.pdf/9553212)

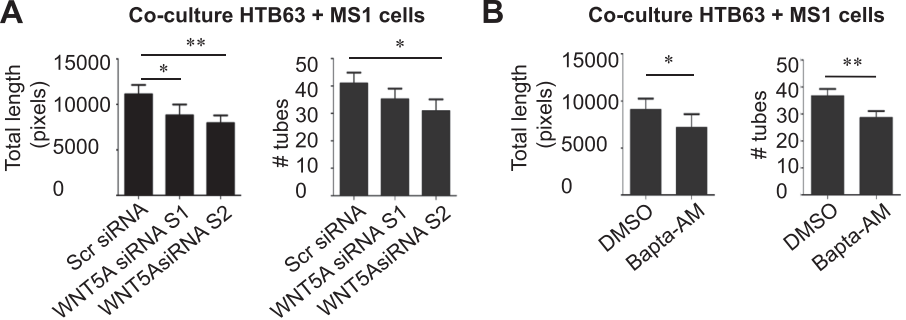

**C** MS1 cells + Mewo Exosomes

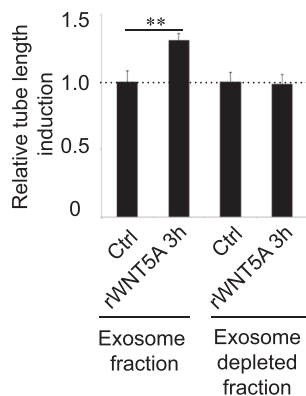

**D** Q-PCR of Exosome treated MS1 cells

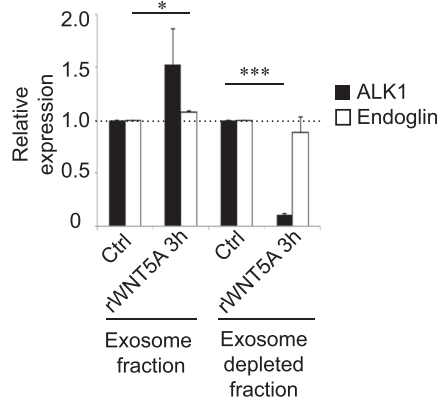

**E** Malignant melanoma Gene expression data set

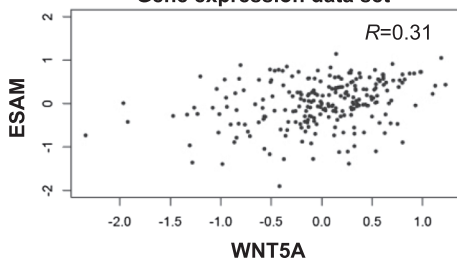

Supplement: MOESM8 [file 9553212]
